# Supplementary material for: Cobalt/molybdenum carbide@N-doped carbon as a bifunctional electrocatalyst for hydrogen and oxygen evolution reactions
Source: Royal Society of Chemistry journal article supplement (doi:10.1039/c7ta04893a), 2017-01-01
Supplement: c7ta04893a1.pdf [file c7ta04893a1.pdf]

**Electronic Supplementary Information (ESI) for**

**Cobalt/molybdenum carbide@n-doped carbon as  
bifunctional electrocatalysts for hydrogen and oxygen  
evolution reactions**

Jing Jiang\*, Qiuxia Liu, Chunmei Zeng, and Lunhong Ai\*

Chemical Synthesis and Pollution Control Key Laboratory of Sichuan Province, College of Chemistry and Chemical Engineering, China West Normal University, 1# Shida Road, Nanchong 637002, P.R. China.

\*E-mail: 0826zjjh@163.com (J. Jiang); ah\_aihong@163.com (L. Ai), Tel/Fax: +86-817-2568081

As for the synthesis of cobalt/molybdenum carbide@N-doped carbon, the mixture of melamine, molybdate and cobalt salt were used as a precursor for the solid phase pyrolysis under inert atmospheres. As well reported previously,<sup>1-4</sup> the use of melamine is critical, which undergoes carbonization and helps the deoxygenation of ammonium molybdate at high temperatures. The metal salts are decomposed and turn into metal nanoparticles and melamine is converted into graphitic carbon nitride when the temperature is around 500 °C (eqn 1). As the temperature increases to 700 °C, graphitic carbon nitride is thermally transformed to NC and further helps the formation of cobalt/molybdenum carbide@N-doped carbon (eqn 2).

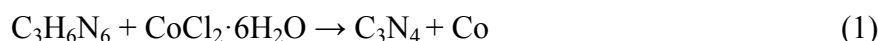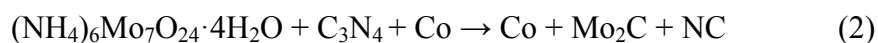

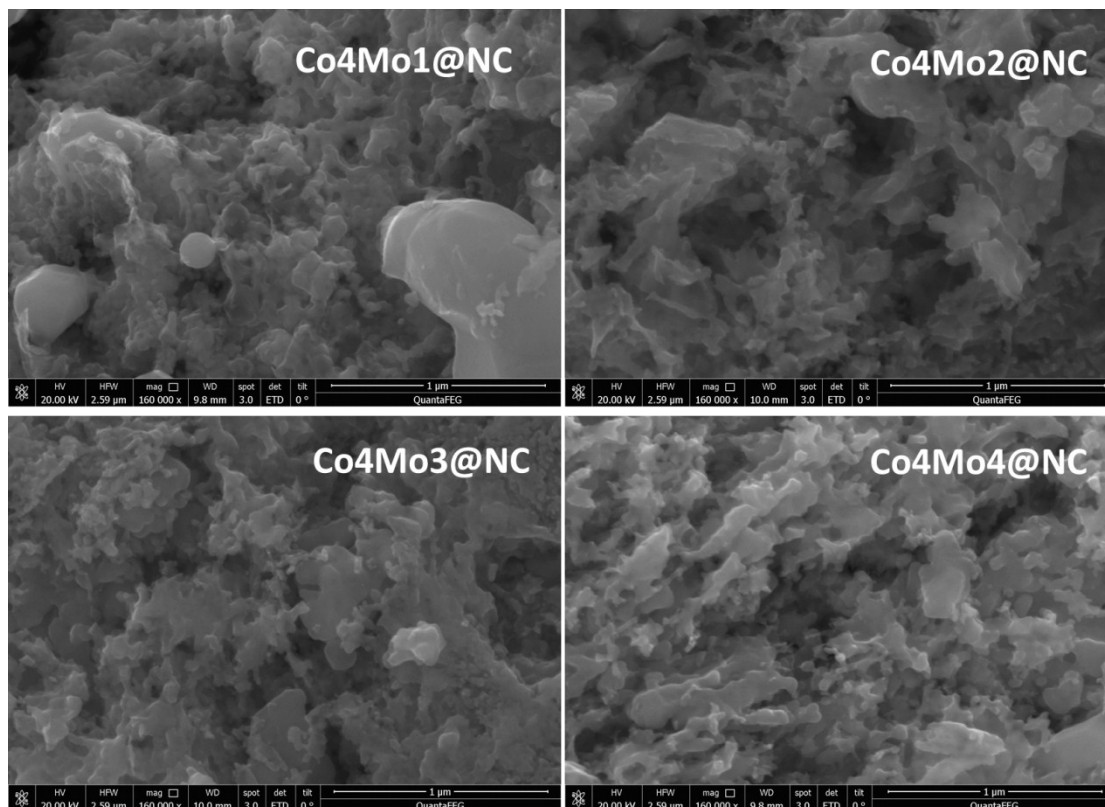

**Fig. S1** SEM images of Co<sub>4</sub>Mo<sub>1</sub>@NC (a), Co<sub>4</sub>Mo<sub>2</sub>@NC (b), Co<sub>4</sub>Mo<sub>3</sub>@NC (c) and Co<sub>4</sub>Mo<sub>4</sub>@NC (d).

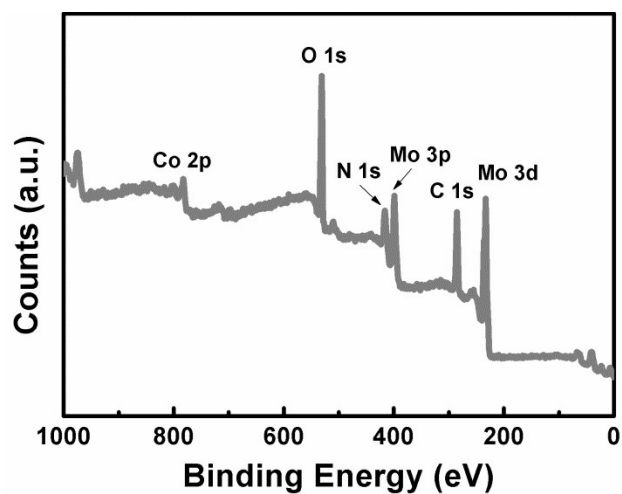

**Fig. S2** Survey XPS spectrum of the Co<sub>4</sub>Mo<sub>2</sub>@NC.

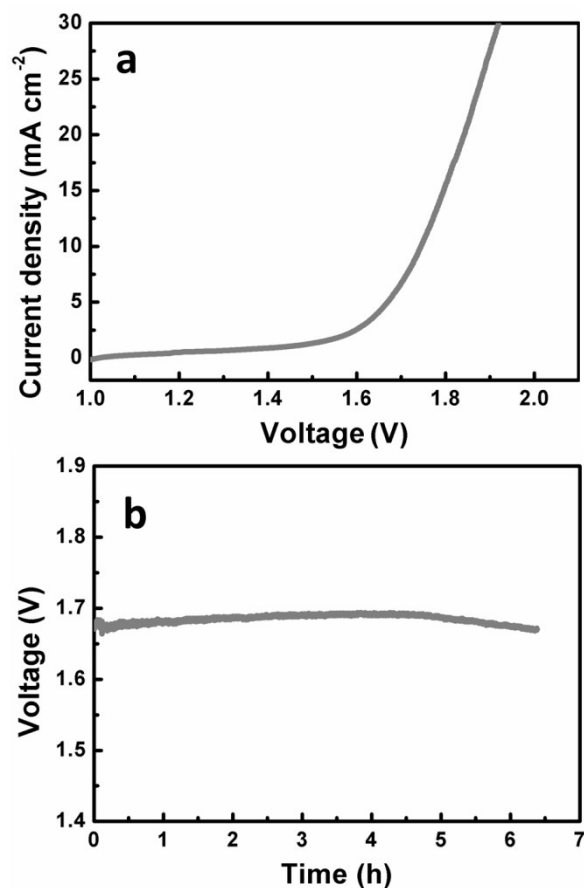

**Fig. S3** Polarization curves for overall water splitting of  $\text{Co}_4\text{Mo}_2@\text{NC}/\text{Ti}||\text{Co}_4\text{Mo}_2@\text{NC}/\text{Ti}$  in a two electrode configuration at a scan rate of  $5 \text{ mV s}^{-1}$  in  $1.0 \text{ M KOH}$ . (b) Chronopotentiometric curve of water electrolysis for  $\text{Co}_4\text{Mo}_2@\text{NC}/\text{Ti}||\text{Co}_4\text{Mo}_2@\text{NC}/\text{Ti}$  with constant current density of  $5 \text{ mA cm}^{-2}$  in  $1.0 \text{ M KOH}$ .

#### References:

1. Y. P. Liu, G. T. Yu, G. D. Li, Y. H. Sun, T. Asefa, W. Chen and X. X. Zou, *Angew. Chem. Int. Ed.*, 2015, **54**, 10752.
2. R. G. Ma, Y. Zhou, Y. F. Chen, P. X. Li, Q. Liu and J. C. Wang, *Angew. Chem. Int. Ed.*, 2015, **54**, 14723.
3. X. Zhang, L. Huang, Y. Han, M. Xu and S. Dong, *Nanoscale*, 2017, **9**, 5583.
4. C.-Y. Su, H. Cheng, W. Li, Z.-Q. Liu, N. Li, Z. Hou, F.-Q. Bai, H.-X. Zhang, and T.-Y. Ma, *Adv. Energy Mater.*, 2017, **7**, 1602420.
